# Supplementary material
Source: PubMed Central journal article supplement (PMC3864349)
Supplement: 1306601110_pnas.201306601SI.pdf [file 1306601110_pnas.201306601SI.pdf]

# Supporting Information

Marenduzzo et al. 10.1073/pnas.1306601110

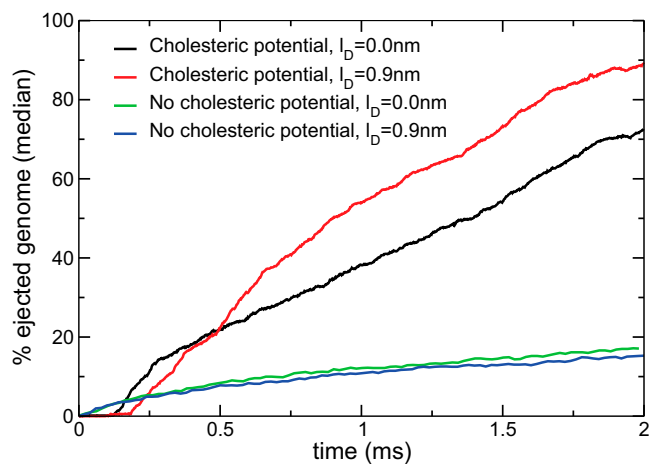

**Fig. S1.** Plot of the median of the percentage of ejected genome against time for the case with chiral bias and Debye length equal to 0 (black curve) or to 0.9 nm as in the main text (red curve) and for the case without chiral bias and Debye length equal to 0 (green curve) or to 0.9 nm as in the main text (blue curve). See main text for more details.

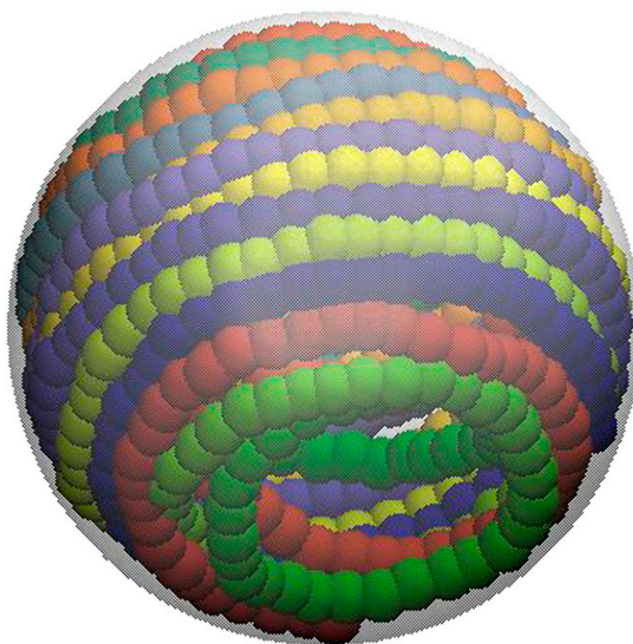

**Movie S1.** Ejection of the genome in the presence of cholesteric interactions. The ejection starts almost immediately after the opening of the exit pore.

[Movie S1](#)

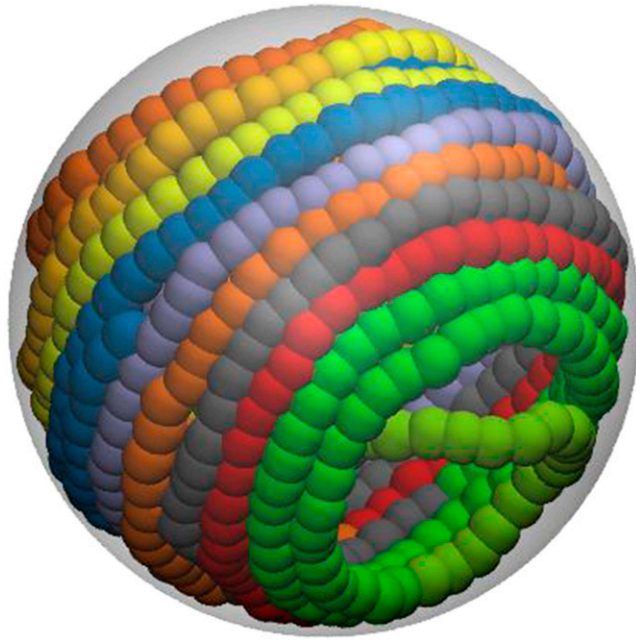

**Movie S2.** Ejection of the genome in the presence of cholesteric interactions. There is a noticeable initial lag phase due to the fact that the end at the exit pore is trapped in the spool. The end is released, and ejection commences, after several global readjustments of the spool.

[Movie S2](#)

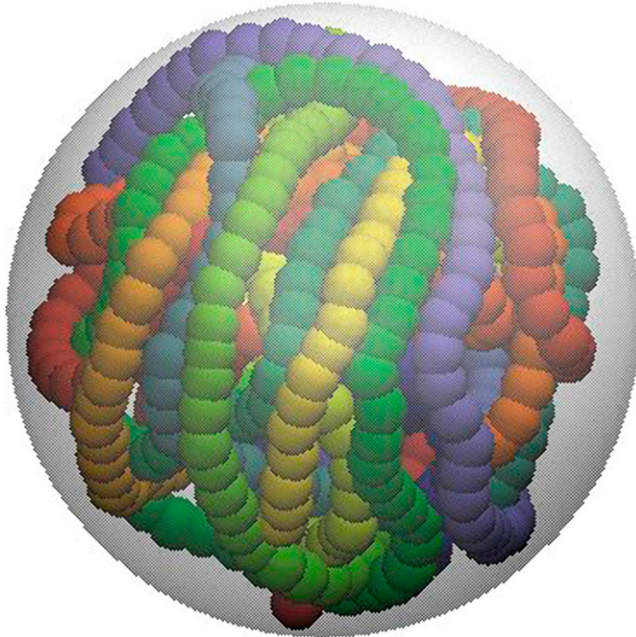

**Movie S3.** Ejection of the first half of the genome without cholesteric interactions. The disordered spool sustains continuous rearrangements.

[Movie S3](#)
